# Supplementary material for: Assessment of toxic effects of thallium on the earthworm Eisenia fetida using the biomarker response index
Source: Royal Society of Chemistry journal article supplement (doi:10.1039/d4em00253a), 2024-01-01
Supplement: d4em00253a1.pdf [file d4em00253a1.pdf]

21 **Table S1**22 **Basic physical and chemical properties of soil.**

| Soil physicochemical parameters       | Value                       |
|---------------------------------------|-----------------------------|
| pH                                    | 7.25                        |
| specific conductance                  | 120.5 $\mu\text{S cm}^{-1}$ |
| cation exchange capacity              | 7.21 $\text{cmol kg}^{-1}$  |
| organic matter                        | 14.2 $\text{g kg}^{-1}$     |
| percentage of saturated water content | 41%                         |
| thallium concentration in soil        | not detected                |
| Soil particle size proportions        |                             |
| Sand                                  | 35.25%                      |
| Silt                                  | 53.03%                      |
| Clay                                  | 11.72%                      |

23

24 **Table S2**25 **Thallium concentration in soil.**

| Nominal soil thallium concentrations<br>( $\text{mg kg}^{-1}$ ) | Soil thallium concentration<br>measurements ( $\text{mg kg}^{-1}$ ) |
|-----------------------------------------------------------------|---------------------------------------------------------------------|
| 0                                                               | not detected                                                        |
| 2.5                                                             | $2.2 \pm 1.4$                                                       |
| 20                                                              | $16.7 \pm 2.1$                                                      |
| 60                                                              | $55.6 \pm 4.5$                                                      |

26

27 **Table S3**28 **Microwave digestion heating program.**

| Order number | Temperature/ $^{\circ}\text{C}$  | Warming time/min | Holding time/min |
|--------------|----------------------------------|------------------|------------------|
| 1            | indoor<br>temperature $\sim 120$ | 6                | 3                |
| 2            | 120 $\sim$ 150                   | 8                | 10               |
| 3            | 150 $\sim$ 180                   | 8                | 30               |

29

30

31 **Table S4**32 **Sequences of primers used for real-time qPCR.**

| Gene           | Accession number | Primer                                             | Amplification efficiency |
|----------------|------------------|----------------------------------------------------|--------------------------|
| <i>β-actin</i> | GU177854         | F: TCCATCGTCCACAGAAAG<br>R: AAATGTCCTCCGCAAGCT     | 99.4%                    |
| <i>Hsp70</i>   | GU177858         | F: CCAAGGACAACAACCTGCTC<br>R: CGGCGTTCTTCACCATTTC  | 100%                     |
| <i>MT</i>      | AJ236886         | F: TGAAAAGTGAGTGCTTGCCG<br>R: CACAGCACCCCTTCTTGCAT | 99.3%                    |
| <i>ANN</i>     | GU177859         | F: TTTCTTCCGCCTGCTTTG<br>R: ACCGACCTACCACCGACA     | 98.3%                    |

33

34

35 **Table S5**36 **The data supporting this article**

| Biomarker                                      | Exposure concentration (mg kg <sup>-1</sup> ) | Day 7       | Day 28      | Day 56      |
|------------------------------------------------|-----------------------------------------------|-------------|-------------|-------------|
| SOD Activity<br>(U mg <sup>-1</sup> prot)      | 0                                             | 139.18±6.47 | 155.92±5.2  | 148.48±6.58 |
|                                                | 2.5                                           | 150.01±3.37 | 154.04±4.27 | 130.4±7.09  |
|                                                | 20                                            | 161.27±7.43 | 137.17±5.14 | 118.92±5.88 |
|                                                | 60                                            | 179.2±3.59  | 112.02±8.44 | 122.56±8.54 |
| CAT Activity<br>(U mg <sup>-1</sup> prot)      | 0                                             | 10.61±0.45  | 10.58±0.53  | 10.1±0.67   |
|                                                | 2.5                                           | 12.06±0.81  | 9.28±0.66   | 9.77±0.59   |
|                                                | 20                                            | 14.26±1.14  | 11.22±0.58  | 7.12±0.56   |
|                                                | 60                                            | 13.09±0.81  | 7.83±0.72   | 6.92±0.64   |
| GST Activity<br>(U mg <sup>-1</sup> prot)      | 0                                             | 40.55±1.41  | 45.3±2.5    | 46.23±1.63  |
|                                                | 2.5                                           | 45.13±2.86  | 46.02±2.62  | 41.35±2.27  |
|                                                | 20                                            | 55.36±1.26  | 37.55±2.44  | 33.86±2.08  |
|                                                | 60                                            | 65.95±4.06  | 37.92±1.29  | 28.92±1.91  |
| MDA Content<br>(nmol mg <sup>-1</sup> prot)    | 0                                             | 1.3±0.06    | 1.49±0.05   | 1.54±0.11   |
|                                                | 2.5                                           | 1.44±0.1    | 1.71±0.1    | 1.88±0.08   |
|                                                | 20                                            | 1.38±0.07   | 1.83±0.08   | 2.34±0.23   |
|                                                | 60                                            | 1.47±0.08   | 2.12±0.21   | 2.71±0.23   |
| 8-OHdG Content<br>(ng L <sup>-1</sup> )        | 0                                             | 22.33±0.86  | 21.93±0.86  | 19.54±0.41  |
|                                                | 2.5                                           | 23.92±1.33  | 23.82±1.01  | 20.21±0.81  |
|                                                | 20                                            | 27.06±1.93  | 28.66±1.29  | 25.73±1.17  |
|                                                | 60                                            | 26.06±0.5   | 32.27±0.82  | 26.85±1.1   |
| Relative expression level of <i>Hsp70</i> gene | 0                                             | 1.04±0.07   | 1.1±0.04    | 1.05±0.06   |
|                                                | 2.5                                           | 1.23±0.07   | 1.34±0.07   | 1.34±0.07   |
|                                                | 20                                            | 1.46±0.05   | 1.74±0.07   | 1.93±0.08   |
|                                                | 60                                            | 1.73±0.08   | 1.93±0.08   | 2.42±0.19   |
| Relative expression level of <i>MT</i> gene    | 0                                             | 0.98±0.05   | 1.05±0.08   | 1±0.07      |
|                                                | 2.5                                           | 1.29±0.11   | 1.18±0.05   | 1.22±0.11   |
|                                                | 20                                            | 1.31±0.08   | 1.5±0.07    | 1.52±0.05   |
|                                                | 60                                            | 1.59±0.1    | 1.72±0.09   | 1.92±0.08   |
| Relative expression level of <i>ANN</i> gene   | 0                                             | 1.11±0.06   | 1.39±0.08   | 1.08±0.09   |
|                                                | 2.5                                           | 1.28±0.09   | 1.12±0.07   | 0.73±0.03   |
|                                                | 20                                            | 1.32±0.03   | 0.89±0.06   | 0.53±0.03   |
|                                                | 60                                            | 1.08±0.07   | 0.65±0.05   | 0.39±0.02   |

## 38 **Text S1**

39 The 0.5 g of soil was placed in the digestive tube, then 5 mL of concentrated HNO<sub>3</sub>,  
40 3 ml of hydrofluoric acid, and 3 ml of hydrogen peroxide were added and rinsed  
41 according to the heating procedure (Table S3). The rinsing solution was cooled to room  
42 temperature and transferred to a 25 mL volumetric flask, and the solution was diluted  
43 with 1% nitric acid and then passed through a 0.45 μm membrane to be measured.  
44 Thallium (Tl) standards were obtained from Tanmo Technology Company (Jiangsu,  
45 China). Graphite furnace atomic absorption spectrophotometry (Thermo Fisher  
46 Scientific, ICE 3500) was used for the analysis. Tl content in soil was expressed as μg  
47 g<sup>-1</sup> (wet weight). Tl recovery was determined by adding a known amount of Tl standard  
48 to the samples and the average recovery was 104.17 ± 0.11%.

49

## 50 **Text S2**

### 51 **Methods for the determination of biomarkers of oxidative stress**

#### 52 **1. Homogenizing solution preparation**

53 Earthworm samples were mixed with a PBS buffer solution containing KH<sub>2</sub>PO<sub>4</sub>  
54 and K<sub>2</sub>HPO<sub>4</sub> (0.1 mol L<sup>-1</sup>, pH = 7.4) in a ratio of 1:9 (weight : volume). The resulting  
55 mixture was homogenized using a mechanical homogenizer while being cooled under  
56 ice-water bath conditions. The homogenate was then centrifuged at 4,000 rpm for 10  
57 minutes. The supernatant was collected for biomarker analysis.

#### 58 **2. Calculation of protein content**

59 Protein determination was performed by Caulmers Brilliant Blue method. In brief,  
60 when the -NH<sup>3+</sup> group of protein molecule encounters the brownish-red Caulmers  
61 Brilliant Blue colorant, the anion on the Caulmers Brilliant Blue dye combines with the  
62 protein -NH<sup>3+</sup> to make the solution turn blue, and the protein content can be calculated  
63 by measuring the absorbance.<sup>1</sup> The assay was carried out according to the instructions  
64 of TP Kit (Catalog No. A045-2) from Nanjing Jiancheng Bioengineering Institute  
65 (Nanjing, China). Briefly, 0.05 mL of homogenized supernatant was taken, added to  
66 the working solution, mixed, and allowed to stand for 10 min, and the absorbance value  
67 was measured at 595 nm. The protein content was calculated following the instructions  
68 from the manufacturer.

#### 69 **3. Superoxide dismutase (SOD)**

70 SOD activity was measured using the WST-1 method, which generates a water-  
71 soluble dye by reacting WST-1 with superoxide anion. The assay was carried out

72 according to instructions provided by the SOD Assay Kit (catalog no. A001-3) from  
73 Nanjing Jiancheng Bioengineering Institute (Nanjing, China). UV absorbance readings  
74 at 450 nm were taken with a UV-2600 spectrophotometer (Shimadzu, Kyoto, Japan),  
75 and the SOD activity of each sample was subsequently calculated.

#### 76 **4. Catalase (CAT)**

77 CAT was measured by the ammonium molybdate method. Briefly, the  
78 decomposition of H<sub>2</sub>O<sub>2</sub> by CAT can be rapidly stopped by adding ammonium  
79 molybdate. The remaining H<sub>2</sub>O<sub>2</sub> then reacts with the ammonium molybdate to form a  
80 yellowish complex, which is measured at 405 nm to calculate the activity of CAT.<sup>2</sup> The  
81 CAT activity of each sample was determined according to the instructions of the CAT  
82 Assay Kit (Catalog No. A007-1-1) from Nanjing Jiancheng Bioengineering Institute  
83 (Nanjing, China). UV absorbance was measured at 405 nm using a UV-2600  
84 spectrophotometer (Shimadzu, Kyoto, Japan). CAT activity was calculated according  
85 to the formula provided by the manufacturer.

#### 86 **5. Glutathione S-transferase (GST)**

87 The activity of GST was performed using the instructions of the GST Assay Kit  
88 (Catalog No. A004-1-1) from Nanjing Jiancheng Bioengineering Institute (Nanjing,  
89 China). Briefly, 0.1 mL of homogenate supernatant was taken and mixed with the  
90 working solution. The mixture was then centrifuged, and the supernatant was collected  
91 as the supernatant of the color development reaction. Subsequently, 2 mL of the color  
92 reaction supernatant was taken and reacted with the application solution. The  
93 absorbance at 412 nm was measured to calculate the GST activity of each sample.

#### 94 **6. Malondialdehyde (MDA)**

95 MDA was determined by the TBA method. The method utilizes the fact that MDA  
96 in the degradation products of lipid peroxidation can condense with thiobarbituric acid  
97 (TBA) to form a red product with a maximum absorption peak at 532 nm.<sup>3</sup> The assay  
98 was performed according to the instructions of the MDA Kit (Catalog No. A003-1)  
99 from Nanjing Jiancheng Bioengineering Institute (Nanjing, China). Briefly, 0.2 mL of  
100 homogenized supernatant was introduced into the working solution, thoroughly mixed,  
101 and subsequently subjected to a 40-minute heating at 95°C in a water bath. Following  
102 this, the sample was cooled using running water and centrifuged at a speed of 3,500 to  
103 4,000 revolutions per minute for 10 minutes. The extracted supernatant is measured at  
104 a wavelength of 532 nanometers. The MDA content was calculated following the  
105 instructions of the manufacturer.

## 106 7. 8-hydroxy-2'-deoxyguanosine (8-OHdG)

107 8-OHdG content was tested by kit procedure. First, the tissue homogenate was  
108 added to the purified antibodies of 8-OHdG. After thoroughly washing and drying the  
109 plate, horseradish peroxidase (HRP)-conjugated 8-OHdG antibody reagent was added.  
110 After washing and drying, 3,3',5,5'-tetramethyl benzidine (TMB) was added to develop  
111 color at 37 °C for 25 min. The color depth of the solution was positively correlated with  
112 the 8-OHdG content. Finally, 1 M sulfuric acid was added to stop the reaction. The OD  
113 value was determined to be 450 nm.

114

### 115 Text S3

#### 116 The BRI index calculation method

117 The Biomarker Response Index (BRI) is calculated comprehensively through three  
118 steps, summarizing four Biological Health Statuses (BHS). Firstly, the alteration level  
119 ( $AL$ ) for each biomarker is calculated using equation (1):

$$120 \quad AL = (BR_t - BR_c) / BR_c \quad (1)$$

121 where  $BR_t$  and  $BR_c$  refer to biomarker responses of exposure and control  
122 treatments, respectively.

123 Secondly, weights are assigned based on the mechanism of action of each  
124 biomarker. For biomarkers such as SOD, CAT, and GST, which do not directly reflect  
125 toxicity, a weight of 1.0 is assigned. Biomarkers related to specific adverse effects, such  
126 as MDA, are assigned a weight of 1.2, and 8-OHdG, which is associated with oxidative  
127 DNA damage, is given a weight of 1.5. Biomarkers related to genetic damage, such as  
128 Hsp70, MT, and ANN, are assigned a weight of 1.0.

129 Thirdly, the Biomarker Response Index (BRI) is calculated by integrating the  
130 values using equation (2).

$$131 \quad BRI = \sum(S_n \times W_n) / \sum W_n \quad (2)$$

132 In this context,  $S_n$  represents the score of each biomarker, while  $W_n$  denotes the  
133 corresponding weight.

134 Ultimately, the BRI value is classified into four Biological Health Status (BHS)  
135 levels according to the categorization by Hagger *et al.*,<sup>4</sup> ranging from 1.0 to 2.5 (severe  
136 alterations), 2.51 to 2.75 (major alterations), 2.76 to 3.00 (moderate alterations), and  
137 3.01 to 4.00. Due to the broad range of the last interval, it is further subdivided into 3.01  
138 to 3.75 (minor alterations) and 3.76 to 4.00 (normal response with no change).

139

140 **References**

- 141 1 M.M. Bradford, *Anal. Biochem.*, 1976, **72**, 248-254.
- 142 2 X. Yao, C. Wang, M. Li, Y. Jiao, Q. Wang, X. Li, K. Liu, G. Liu, J. Wang, L. Zhu and J. Wang, *J.*  
143 *Environ. Manage.*, 2023, **331**, 117321.
- 144 3 J. Fernández, J.A. Pérez-Álvarez and J.A. Fernández-López, *Food Chem.*, 1997, **59**, 345-353.
- 145 4 J.A. Hagger, M.B. Jones, D. Lowe, D. Leonard, R. Owen and T.S. Galloway, *Mar. Pollut. Bull.*, 2008,  
146 **56**, 1111-1118.
